# Supplementary material for: The efficacy and safety of adjunctive corticosteroids in the treatment of tuberculous pleurisy: a systematic review and meta-analysis
Source: PubMed Central journal article supplement (PMC5669971; doi:10.18632/oncotarget.18160), 2017-05-24
Supplement: oncotarget-08-83315-s001.pdf [file oncotarget-08-83315-s001.pdf]

# The efficacy and safety of adjunctive corticosteroids in the treatment of tuberculous pleurisy: a systematic review and meta-analysis

## SUPPLEMENTARY MATERIALS

Additional Files in Supplementary Files

Additional File 1: Search strategies: A list of included and excluded articles and reasons of exclusion

Additional File 2: PRISMA checklist

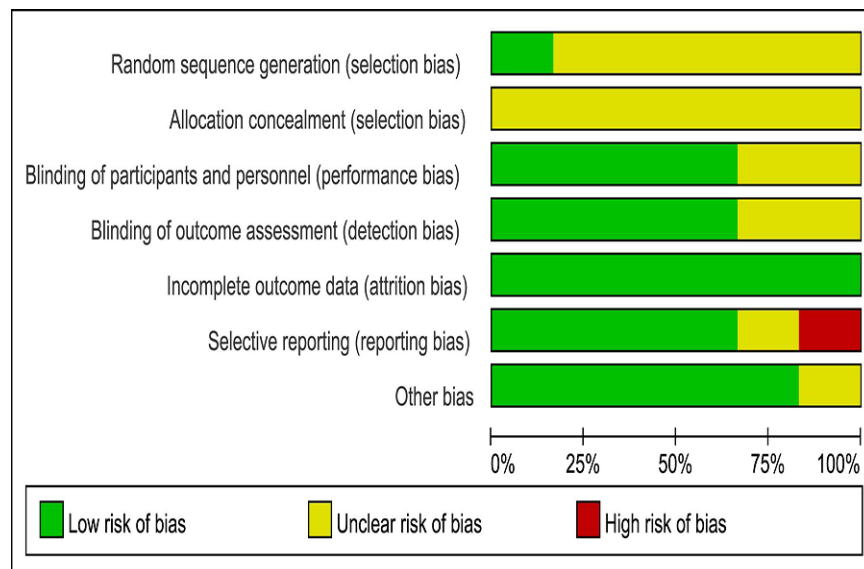

Supplementary Figure 1: Summary of the bias risk in included randomized controlled trials.

|              | Random sequence generation (selection bias) | Allocation concealment (selection bias) | Blinding of participants and personnel (performance bias) | Blinding of outcome assessment (detection bias) | Incomplete outcome data (attrition bias) | Selective reporting (reporting bias) | Other bias |
|--------------|---------------------------------------------|-----------------------------------------|-----------------------------------------------------------|-------------------------------------------------|------------------------------------------|--------------------------------------|------------|
| Bang 1997    | ?                                           | ?                                       | ?                                                         | ?                                               | +                                        | +                                    | +          |
| Elliott 2004 | +                                           | ?                                       | +                                                         | +                                               | +                                        | +                                    | +          |
| Galarza 1995 | ?                                           | ?                                       | +                                                         | +                                               | +                                        | +                                    | ?          |
| Lee 1988     | ?                                           | ?                                       | +                                                         | +                                               | +                                        | -                                    | +          |
| Lee 1999     | ?                                           | ?                                       | ?                                                         | ?                                               | +                                        | +                                    | +          |
| Wyser 1996   | ?                                           | ?                                       | +                                                         | +                                               | +                                        | ?                                    | +          |

Supplementary Figure 2: Results of the bias risk with each item in included randomized controlled trials.

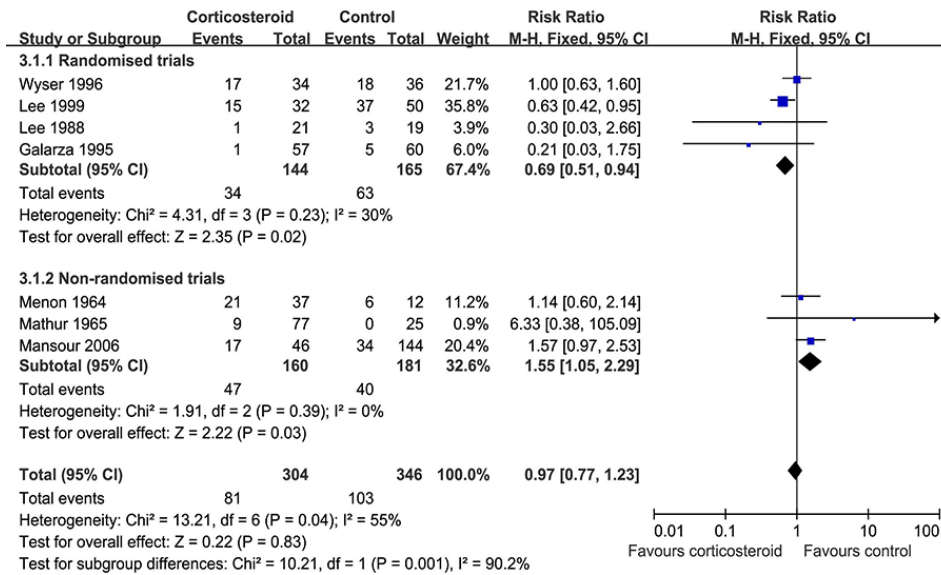

**Supplementary Figure 3: Adjunctive corticosteroid uses on pleural thickening: response rate = 0.97 (95% confidence interval: 0.77–1.23).**

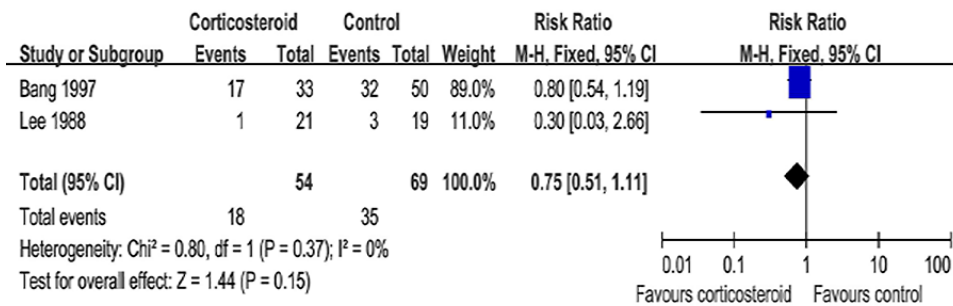

**Supplementary Figure 4: Adjunctive corticosteroid uses on pleural adhesions: response rate = 0.75 (95% confidence interval: 0.51–1.11).**

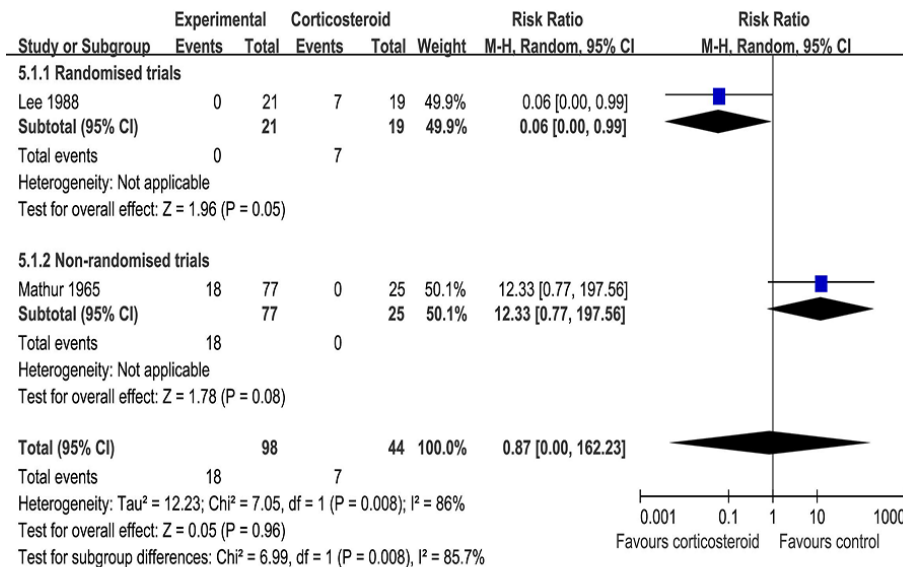

**Supplementary Figure 5: Adjunctive corticosteroid uses on clinical symptoms after 7.0 d: response rate = 0.87 (95% confidence interval: 0.00–162.23).**

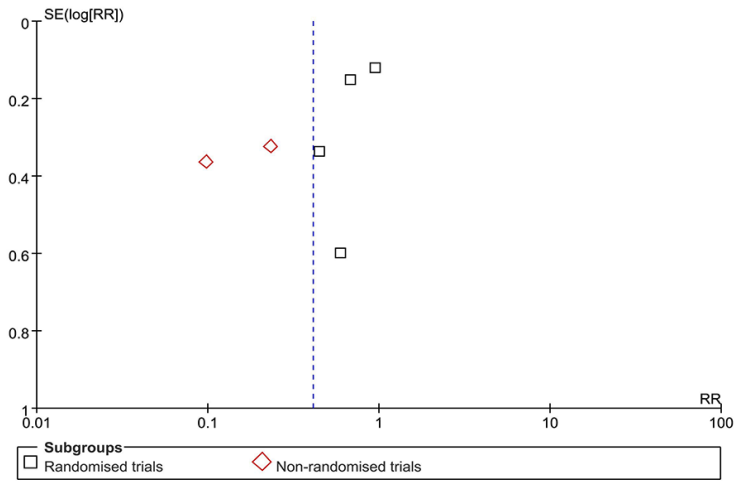

**Supplementary Figure 6: Adjunctive corticosteroid uses on reabsorption of pleural effusion at 4.0 weeks.** RR: response rate.

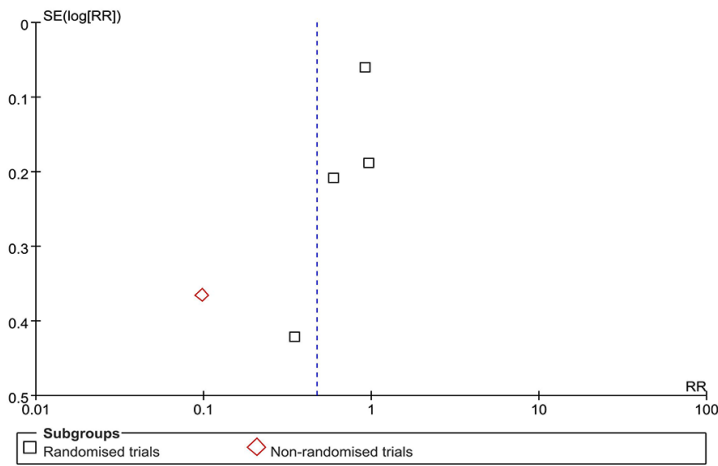

**Supplementary Figure 7: Adjunctive corticosteroid uses on reabsorption of pleural effusion at 8.0 weeks.** RR: response rate.

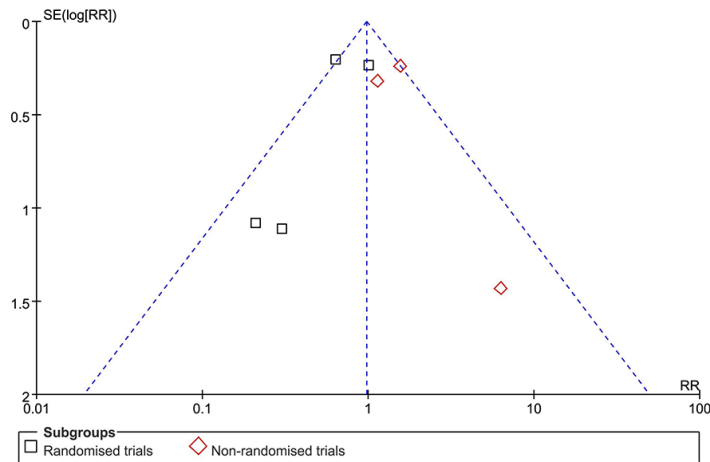

**Supplementary Figure 8: Adjunctive corticosteroid uses on pleural thickening.** RR: response rate.

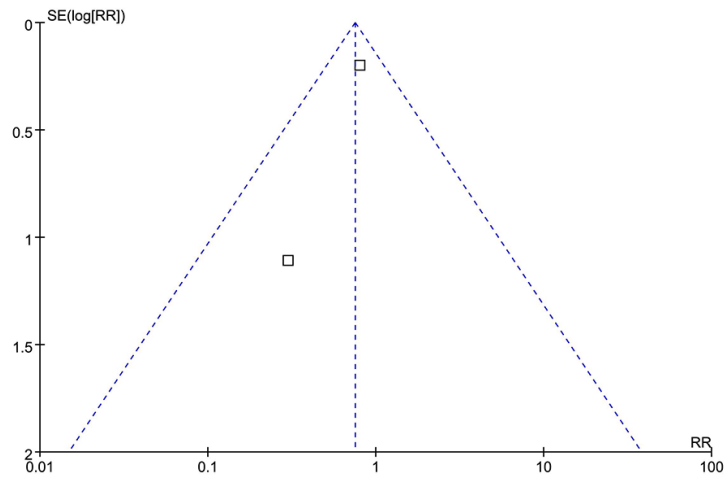

Supplementary Figure 9: Adjunctive corticosteroid uses on pleural adhesions. RR: response rate.

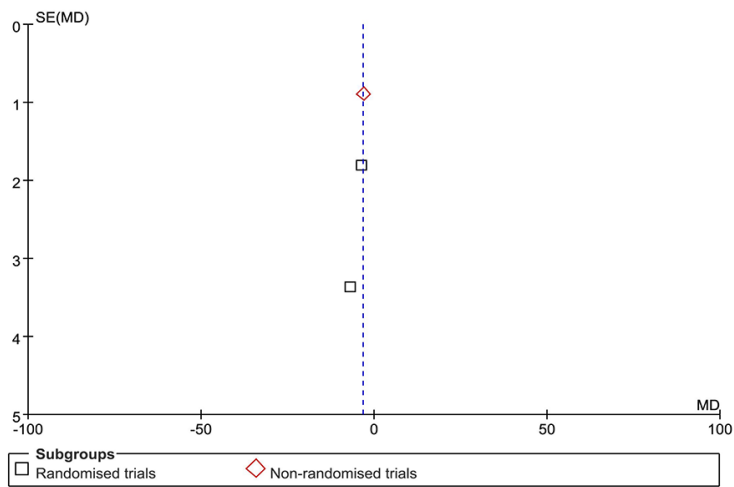

Supplementary Figure 10: Adjunctive corticosteroid uses on the number of days of clinical symptoms. WMD: weighted mean difference.

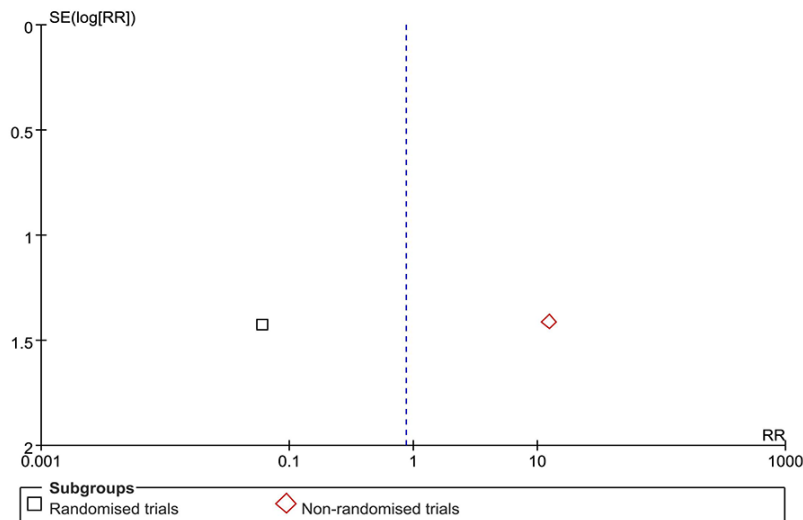

Supplementary Figure 11: Adjunctive corticosteroid uses on clinical symptoms after 7.0 d. RR: response rate.

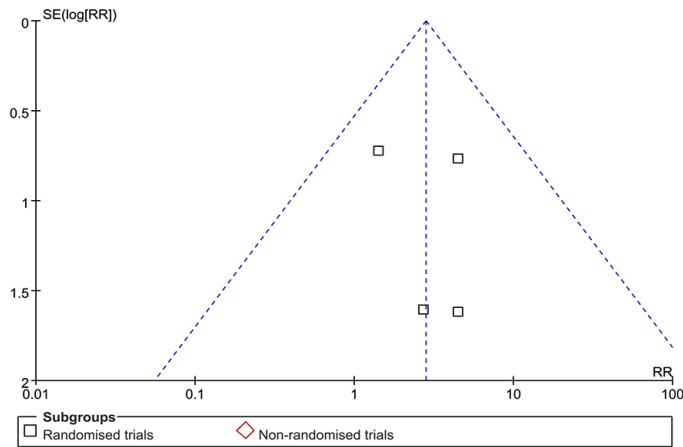

Supplementary Figure 12: Adjunctive corticosteroid uses on adverse events. RR: response rate.

| Supplementary Table 1: Corticosteroids versus control (placebo or no steroids) |                |                     |                                      |                                |
|--------------------------------------------------------------------------------|----------------|---------------------|--------------------------------------|--------------------------------|
| Outcome or subgroup title                                                      | No. of studies | No. of participants | Statistical method                   | Effect size                    |
| Residual fluid at 4 weeks                                                      | 6              | 585                 | Risk Ratio (M-H, Fixed, 95% CI)      | 0.54 [0.45, 0.64] asymmetric   |
| Residual fluid at 8 weeks                                                      | 6              | 550                 | Risk Ratio (M-H, Fixed, 95% CI)      | 0.60 [0.51, 0.71] asymmetric   |
| Presence of pleural thickening                                                 | 7              | 650                 | Risk Ratio (M-H, Fixed, 95% CI)      | 0.97 [0.77, 1.23] asymmetric   |
| Presence of pleural adhesions                                                  | 2              | 123                 | Risk Ratio (M-H, Fixed, 95% CI)      | 0.75 [0.51, 1.11] asymmetric   |
| Days to improvement in symptoms                                                | 3              | 313                 | Mean Difference (IV, Random, 95% CI) | -3.32 [-4.84, -1.79] symmetric |
| Clinical symptoms after 7 days                                                 | 2              | 142                 | Risk Ratio (M-H, Random, 95% CI)     | 0.87 [0.00, 162.23] symmetric  |
| Adverse events                                                                 | 7              | 688                 | Risk Ratio (M-H, Fixed, 95% CI)      | 2.80 [1.12, 6.98] symmetric    |
| Death from any cause                                                           | 1              | 194                 | Risk Ratio (M-H, Fixed, 95% CI)      | 0.92 [0.65, 1.32]              |
| HIV-associated events                                                          | 1              | 97                  | Risk Ratio (M-H, Fixed, 95% CI)      | 13.00 [0.74, 227.63]           |

**Supplementary Table 2: Methodological quality of included case-control studies based on the Newcastle-Ottawa Scale.**

| Case-control studies | Selection                    |                         |                       |                        | Comparability                                     | Exposure                  |                                                     |                   | Total score |
|----------------------|------------------------------|-------------------------|-----------------------|------------------------|---------------------------------------------------|---------------------------|-----------------------------------------------------|-------------------|-------------|
|                      | Adequate definition of cases | Representative of cases | Selection of controls | Definition of controls | Control important factor for or additional factor | Ascertainment of exposure | Same method of ascertainment for cases and controls | Non-response rate |             |
| Aspin [23]           |                              | *                       | *                     | *                      |                                                   | *                         | *                                                   |                   | 5           |
| Menon [8]            | *                            | *                       | *                     | *                      |                                                   | *                         | *                                                   |                   | 6           |
| Mathur [24]          | *                            | *                       | *                     | *                      |                                                   | *                         | *                                                   |                   | 6           |
| Mansour [10]         | *                            | *                       | *                     | *                      | *                                                 | *                         | *                                                   |                   | 7           |

**Supplementary Table 3; Adverse events of corticosteroid therapy in tuberculous pleurisy**

| Study        | Year | Side effects (cases)                                                                         |
|--------------|------|----------------------------------------------------------------------------------------------|
| Aspin [23]   | 1958 | Rebound phenomenon (n=1)                                                                     |
| Menon [8]    | 1964 | Transient moon face (a few cases)                                                            |
| Mathur [24]  | 1965 | No side effect                                                                               |
| Lee [20]     | 1988 | Epigastralgia, edema, transient moon face(n=1)                                               |
| Galarza [9]  | 1995 | No side effect                                                                               |
| Wyser [22]   | 1996 | Epigastric pain (n=4)                                                                        |
| Bang [18]    | 1997 | Side effect (n=1)                                                                            |
| Lee [21]     | 1999 | No side effect                                                                               |
| Elliott [19] | 2004 | Hyperglycemia (n=2) Hypertension (n=3) Ative herpeszoster (n=3) Esophageal candidiasis (n=1) |
| Mansour [10] | 2006 | Not state                                                                                    |
